# Supplementary material for: Hepatocyte Growth Factor Reduces Free Cholesterol‐Mediated Lipotoxicity in Primary Hepatocytes by Countering Oxidative Stress
Source: Hindawi journal article supplement (doi:10.1155/2016/7960386), 2016-01-01
Supplement: f1 [file 7960386.f1.pdf]

## Supplementary information and data

| Antibody      | Catalog  | Company                  | Dilution |
|---------------|----------|--------------------------|----------|
| Catalase      | C0979    | Sigma Aldrich            | 1:3000   |
| SOD 1         | sc-11407 | Santa Cruz Biotechnology | 1:2000   |
| $\gamma$ -GCS | sc-22755 | Santa Cruz Biotechnology | 1:1000   |
| MGST          | sc-138   | Santa Cruz Biotechnology | 1:200    |
| GPX 3/5/6     | sc-55102 | Santa Cruz Biotechnology | 1:200    |
| G6PD          | 8866     | Cell Signaling           | 1:1000   |
| Actin         | A3854    | Sigma Aldrich            | 1:10,000 |

Supplementary table 1. Antibodies used in Western blots studies in the present work  
SOD, Superoxide dismutase;  $\gamma$ -GCS,  $\gamma$ -glutamylcysteine synthetase; MGST, mammal  
Glutathione S transferase; GPX, Glutathione peroxidase. G6PD, Glucose-6-Phosphate  
Dehydrogenase

A)

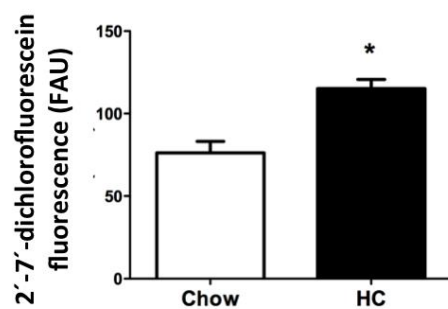

B)

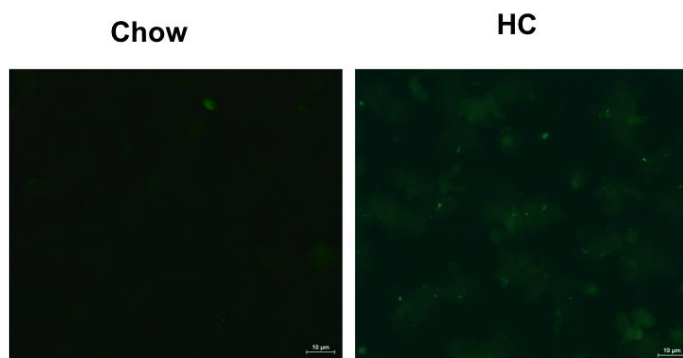

C)

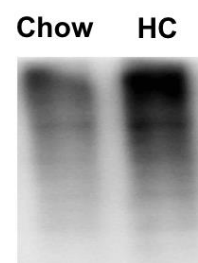

**Supplementary figure 1** *Cholesterol induces oxidative stress in primary mouse hepatocytes.* Peroxides content determined by DCFH fluorescence in, (A) chow and, (B) HC hepatocytes. (C) Quantification of 2',7'-dichlorofluorescein fluorescence, data are reported as fluorescence arbitrary units (FAU). (D) Protein oxidation determined by oxyblot. Images are representative of at least three independent experiments. Each column represents mean  $\pm$  SEM of at least four independent experiments. \*  $p < 0.05$  vs chow diet.

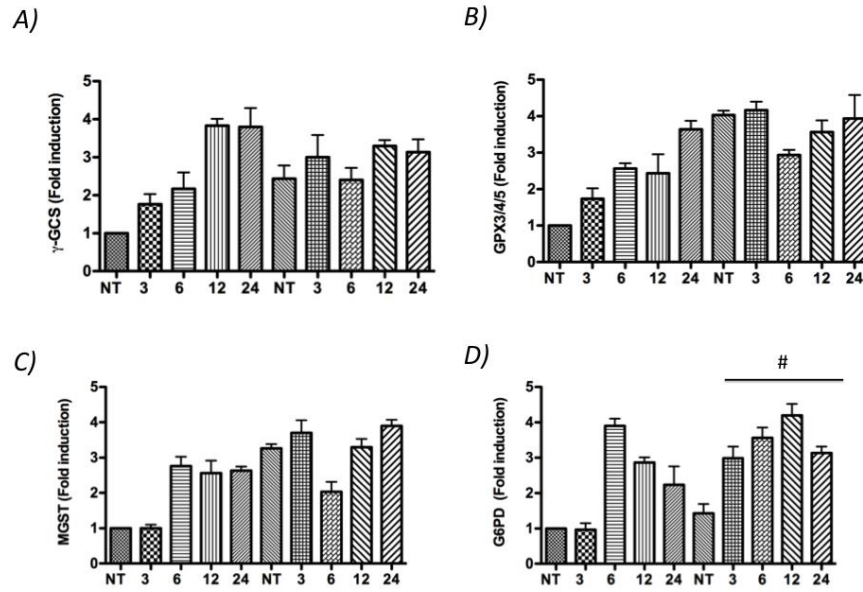

**Supplementary figure 2** *HGF effect on antioxidants enzymes.* Densitometric analysis of Western blots of figure 4. (A)  $\gamma$ - gamma glutamyl cysteine synthetase ( $\gamma$ -GCS); (B) GSH peroxidase (GPX) 3/4/5; (C) mammal GSH S transferase (MGST); and (D) glucose-6-phosphate dehydrogenase (G6PD). Each column represents mean  $\pm$  SEM of at least four independent experiments. \*  $p < 0.05$  vs not treated Chow cells, #  $p < 0.05$  vs not treated HC cells.
